# Supplementary material for: Ferritin Light Chain Confers Protection Against Sepsis-Induced Inflammation and Organ Injury
Source: PubMed Central journal article supplement (PMC6371952; doi:10.3389/fimmu.2019.00131), 2019-02-04
Supplement: Table_1.pdf [file Table_1.pdf]

**Table S1. Serum cytokine profile of FtH<sup>fl/fl</sup> + FtL compared to FtH<sup>fl/fl</sup>**

| <b>Cytokine<br/>(pg/ml)</b> | <b>FtL<br/>(n = 5)</b> | <b>Vehicle<br/>CLP<br/>(n = 11)</b> | <b>FtL<br/>CLP<br/>(n = 11)</b> | <b>p value<br/>(FtL CLP<br/>vs. FtL)</b> | <b>p value<br/>(FtL CLP vs.<br/>Vehicle CLP)</b> |
|-----------------------------|------------------------|-------------------------------------|---------------------------------|------------------------------------------|--------------------------------------------------|
| IFN $\gamma$                | 1.06 $\pm$ 0.14        | 4.58 $\pm$ 0.84                     | 0.56 $\pm$ 0.16                 | ns                                       | <0.0001                                          |
| IL-1 $\beta$                | 2.2 $\pm$ 0.2          | 34.35 $\pm$ 7.37                    | 3.098 $\pm$ 1.1                 | ns                                       | 0.0249                                           |
| IL-2                        | 1.81 $\pm$ 0.69        | 27.18 $\pm$ 5.07                    | 0.47 $\pm$ 0.11                 | ns                                       | 0.0004                                           |
| IL-4                        | 1.18 $\pm$ 0.47        | 13.16 $\pm$ 4.09                    | 0.44 $\pm$ 0.17                 | ns                                       | 0.0031                                           |
| IL-5                        | 2.3 $\pm$ 0.57         | 12.9 $\pm$ 1.78                     | 4.3 $\pm$ 1.67                  | ns                                       | 0.0306                                           |
| IL-6                        | 76.3 $\pm$ 2.7         | 28905 $\pm$ 3191                    | 1701 $\pm$ 514                  | ns                                       | 0.0009                                           |
| IL-10                       | 102 $\pm$ 9.2          | 3075 $\pm$ 711                      | 292 $\pm$ 125                   | ns                                       | 0.023                                            |
| IL-12                       | 159 $\pm$ 27           | 1229 $\pm$ 330                      | 49.4 $\pm$ 11.4                 | ns                                       | 0.0007                                           |
| CXCL1                       | 143.97 $\pm$ 23        | 5466 $\pm$ 238                      | 1306 $\pm$ 376                  | ns                                       | 0.0014                                           |
| TNF $\alpha$                | 25.45 $\pm$ 5.6        | 517 $\pm$ 83                        | 60.87 $\pm$ 24                  | ns                                       | 0.0076                                           |
