# Supplementary material for: Ferritin Light Chain Confers Protection Against Sepsis-Induced Inflammation and Organ Injury
Source: PubMed Central journal article supplement (PMC6371952; doi:10.3389/fimmu.2019.00131), 2019-02-04
Supplement: Table_4.pdf [file Table_4.pdf]

**Table S4. Primers for Real-time PCR analysis**

| <b>Gene</b>   | <b>Forward primer</b>       | <b>Reverse Primer</b>       |
|---------------|-----------------------------|-----------------------------|
| MCP-1         | 5'-ACTCACCTGCTGCTACTCAT-3'  | 5'-CTACAGCTTCTTTGGGACA-3'   |
| IL-1 $\beta$  | 5'-TGGGCCTCAAAGGAAAGA-3'    | 5'-GGTGCTGATGTACCAGTT-3'    |
| IL-6          | 5'-CTGCAAGAGACTTCCATCCAG-3' | 5'AGTGGTATAGACAGGTCTGTTGG-3 |
| TNF- $\alpha$ | 5'-ACGGCATGGATCTCAAAGAC-3'  | 5'-AGATAGCAAATCGGCTGACG-3'  |
| iNOS          | 5'-CCAAGCCCTCACCTACTTCC-3'  | 5'-CTCTGAGGGCTGACACAAGG-3'  |
| IL-10         | 5'-GCTCTTACTGACTGGCATGAG-3' | 5'-CGCAGCTCTAGGAGCATGTG-3'  |
| NLRP3         | 5'-CTGTGTGTGGGACTGAAGCAC-3' | 5'-GCAGCCCTGCTGTTTCAGCAC-3' |
| FtH           | 5'-CCATCAACCGCCAGATCAAC-3'  | 5'-GCCACATCATCTCGGTCAA-3'   |
| HO-1          | 5'-GGTGATGGCTTCCTTGTACC-3'  | 5'-AGTGAGGCCCATACCAGAAG-3'  |
| GAPDH         | 5'-ATCATCCCTGCATCCACT-3'    | 5'-ATCCACGACGGACACATT-3'    |
